# Supplementary material for: Amphotericin B Nano-Assemblies Circumvent Intrinsic Toxicity and Ensure Superior Protection in Experimental Visceral Leishmaniasis with Feeble Toxic Manifestation
Source: MDPI journal article supplement (doi:10.3390/vaccines11010100), 2023-01-01
Supplement: s1 [file s1]

# **Amphotericin B nano-assemblies circumvent intrinsic toxicity and ensure superior protection in experimental visceral leishmaniasis with feeble toxic manifestation**

## **Supplementary Materials**

### *Physico-chemical characterization of the as-synthesized AmB-NA*

The particle size of as-synthesized AmB-NA was measured by photon correlation spectroscopy (90Plus/BI-MAS, Brookhaven Instruments, Holtsville, NY, USA) as described previously [26]. For the measurement of size, samples were diluted in Milli-Q water and monitored for at least 120 seconds. Nanoparticles were used at a concentration of  $10^{-4}$  M. All measurements were carried out in triplicate.

Furthermore, measurement of dynamic light dispersion was conducted using DynaPro-TC-04 equipment (Protein Solutions, Wyatt Technology, Santa Barbara, CA, USA) installed with a temperature-controlled micro sampler. Briefly, the as-synthesized AmB-NA nanoparticles-based formulations (2 mg/mL) were filtered directly into a 12  $\mu$ L quartz cuvette using 0.22  $\mu$ m and 0.02  $\mu$ m Whatman syringe filters. Twenty measurements were taken for each test. Mean hydrodynamic radius ( $R_h$ ) was calculated at optimal resolution using Dynamics technology [26]. Based on an autocorrelation study of scattered light intensity information, the  $R_h$  was estimated based on a Stokes-Einstein relationship translation diffusion coefficient:

$$R_h = \frac{kT}{6\pi\eta D}$$

where  $R_h$  is the hydrodynamic radius,  $k$  is the Boltzmann constant,  $T$  is temperature,  $\eta$  is the viscosity of water, and  $D$  is the diffusion coefficient.

DTS software was used to determine the zeta potential of nanoparticles (Malvern Instruments Limited, Malvern, UK) based on M3-PALS technology. The sample was filtered using a 0.22  $\mu\text{m}$  polyethersulfone syringe filter (Millipore, Bangalore, India). The formulation was lyophilized, followed by reconstitution in a 20 mM phosphate buffer (pH 7.4). The average zeta potential was calculated thrice.

The morphology and size (TEM analysis) of the as-synthesized AmB-NA nanoparticles was characterized using an electron microscope (CM-10, Philips, Hamburg, Germany). AmB-NA nanoparticles (10  $\mu\text{g/mL}$  in MilliQ water) were lyophilized. The lyophilized AmB-NA nanoparticles were suspended in 20 mM phosphate-buffered saline (PBS, pH 7). A single drop of AmB-NA suspension was mounted on a clear glass stub, air-dried, and coated with gold-palladium by means of sputter coater. An accelerating voltage of 20 kV was used for TEM imaging.

The as-synthesized AmB-NA was scanned spectro-photometrically (300–450 nm) on a double beam spectrophotometer (model V-750, Jasco Inc, Easton, MD, USA) operated at a resolution of 1 nm. The analysis of both Fungizone and the AmB-NA was executed employing the same concentration of both formulations ( $10^{-5}$  M). We also performed FTIR spectroscopic studies of as-synthesized AmB nanoparticles employing a Perkin-Elmer FTIR Spectrum One spectrophotometer. FTIR Spectrum One spectrophotometer in the diffuse reflectance mode operating at a resolution of 4  $\text{cm}^{-1}$ . Each sample was scanned three times to check the authenticity of the data. The spectra were taken between 4000  $\text{cm}^{-1}$  and 1000  $\text{cm}^{-1}$  by averaging 128 scans for each spectrum.

#### ***Reverse Transcription Polymerase Chain Reaction (RT-PCR) for determination of cytokine concentration***

Furthermore, variation in the expression level of various cytokines was further validated by a semi-quantitative reverse transcription-polymerase chain reaction (RT-PCR). For this, forward and reverse primers for IFN- $\gamma$ , TNF- $\alpha$ , and IL-10 were synthesized (IDT, India) following the sequence mentioned elsewhere [44]. Likewise, the primer sequence for the TNF- $\alpha$  cytokines was taken from the OriGene website (Rockville, MD, USA). According to the manufacturer's instruction, reverse transcription was executed using 1 $\mu\text{g}$  of total RNA employing a cDNA synthesis kit (Roche, USA). The synthesized cDNA was amplified by PCR for specified genes such as IL-12, IL-10, IFN- $\gamma$ , TNF- $\alpha$ , and GAPDH, etc.<sup>44</sup> The primer for IFN- $\gamma$ , IL-10, TNF- $\alpha$ , and GAPDH were as follows: Forward IFN $\gamma$ : ATGAACGCTACACACTGCAT, Reverse IFN $\gamma$ :

AGTCTGAGGTAGAAAGAGAT, Forward IL-10: GGTGCCTATGTCTCAGCCTCTT Reverse IL-10: CCATAGAAGTATGATGAGAGGGAG, Forward TNF- $\alpha$ : ATGCCTGGCTCAGCACTGCT Reverse TNF- $\alpha$ : TAACCCTTAAAGTCCTGCAT, Forward GAPDH: TGCATCCTGCACCACCAACT, and Reverse GAPDH: TGGGATGACCTTGCCCACAG, respectively. GAPDH was used as a loading control. The PCR mixture (25  $\mu$ l) contains 0.5  $\mu$ M of forward and reverse primer, 0.5mM of each dNTP, 2 mM MgCl<sub>2</sub>, 0.5  $\mu$ g of synthesized cDNA, and 1  $\mu$ l polymerase. Details regarding the sequence of PCR primers, annealing temperature, and PCR product size were done with few modifications performed elsewhere [44]. The PCR was performed for 28 cycles where parameters for each cycle are as follows: (a) denaturation at 95°C for 30 sec, (b) annealing (ranging from 55-62°C) for 30 sec, and (c) extension at 72°C for 45 sec. The sample was preheated at 95 °C for 3 min before PCR. The PCR product was run on 1.5% agarose gel, stained with ethidium bromide (0.5  $\mu$ g/ml). The associated Gene-tool software (Syngene, USA) and gel documentation system were utilized to quantify PCR product.

#### *Determination of nitrite and level of iNOS expression*

To explicate the consequence of bioactive fraction on nitric oxide release, freshly isolated mononuclear splenocytes cells were plated in 12 well microtiter culture plate (1 $\times$ 10<sup>6</sup> cells/mL/well. Cells were stimulated with SLA (20  $\mu$ g/mL) and incubated in the CO<sub>2</sub> incubator at 37 °C for 48 h. Following incubation, cell-free culture supernatants were isolated and stored at -70 °C for further use. The level of nitric oxide (NO) induced in the cultivated cells was quantified using a nitric oxide assay kit (Thermo Fisher Scientific, EMSNO). The NO levels were deduced by using a standard sodium nitrite concentration curve. The minimum detectable concentration of nitrite employing the kit was 0.222 mM. Coherently, iNOS concentration was determined by semi-quantitative RT-PCR<sup>48</sup> using primers Forward iNOS: AGGAGGAGAGAGATCCGATTAG Reverse iNOS: TCAGACTTCCCTGTCTCAGTAG Forward GAPDH: TGCATCCTGCACCACCAACT, and Reverse GAPDH: TGGGATGACCTTGCCCACAG, respectively.

#### *Assessment of reactive oxygen species (ROS) through ELISA*

Reactive oxygen species (ROS) were assessed by ELISA utilizing a cell permeant 0.4mM H<sub>2</sub>DCFDA (2',7'-dichlorodihydrofluorescein diacetate) and lysis buffer. Cultured cell was suspended in 500  $\mu$ l PBS. 0.4mM H<sub>2</sub>DCFDA was added followed by 15 min incubation. Cells were pellet down and washed with 1X PBS. Thereafter, cells were lysed using 300  $\mu$ l Lysis buffer. Following centrifugation supernatant was transferred to 96 well plate. The concentration of ROS was quantified using ELISA reader at 504 nm.
